# Supplementary material for: Synthesis and growth mechanism of Au@Cu core–shell nanorods having excellent antioxidative properties
Source: Royal Society of Chemistry journal article supplement (doi:10.1039/c4ce00672k), 2014-01-01
Supplement: c4ce00672k1.pdf [file c4ce00672k1.pdf]

## Supporting Information

### Synthesis and growth mechanism of Au@Cu core-shell nanorods having a high antioxidative property

Yoshida,<sup>a</sup> Keiko Uto,<sup>b</sup> Masashi Hattori<sup>b</sup> and Masaharu Tsuji<sup>\*a,b</sup>

<sup>a</sup> *Department of Automotive Science, Graduate School of Integrated Frontier Sciences, Kyushu University, Kasuga, 816-8580, Japan*

<sup>b</sup> *Institute for Materials Chemistry and Engineering, Kyushu University, Kasuga 816-8580, Japan.  
Fax: +81-092-583-7815; Tel.: +81-092-583-7815; E-mail:tsuji@cm.kyushu-u.ac.jp*

\*To whom correspondence should be addressed: E-mail: tsuji@cm.kyushu-u.ac.jp

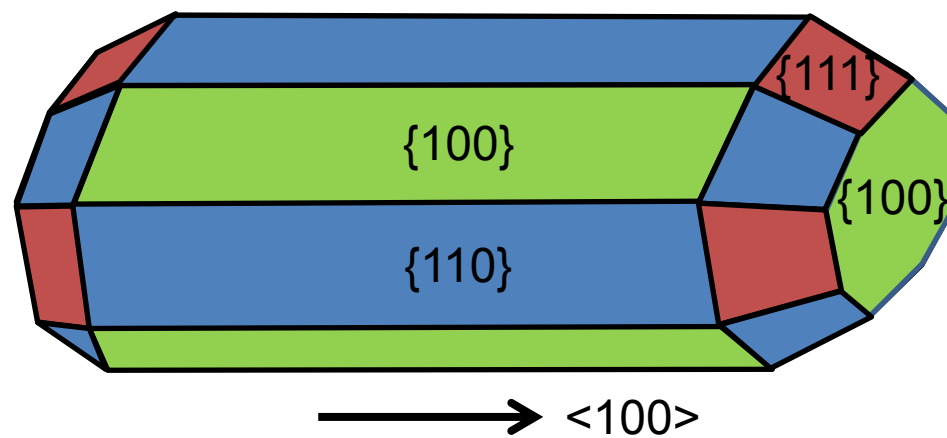

**Fig. S1.** Traditional crystal structures of Au NR prepared using CTAB.

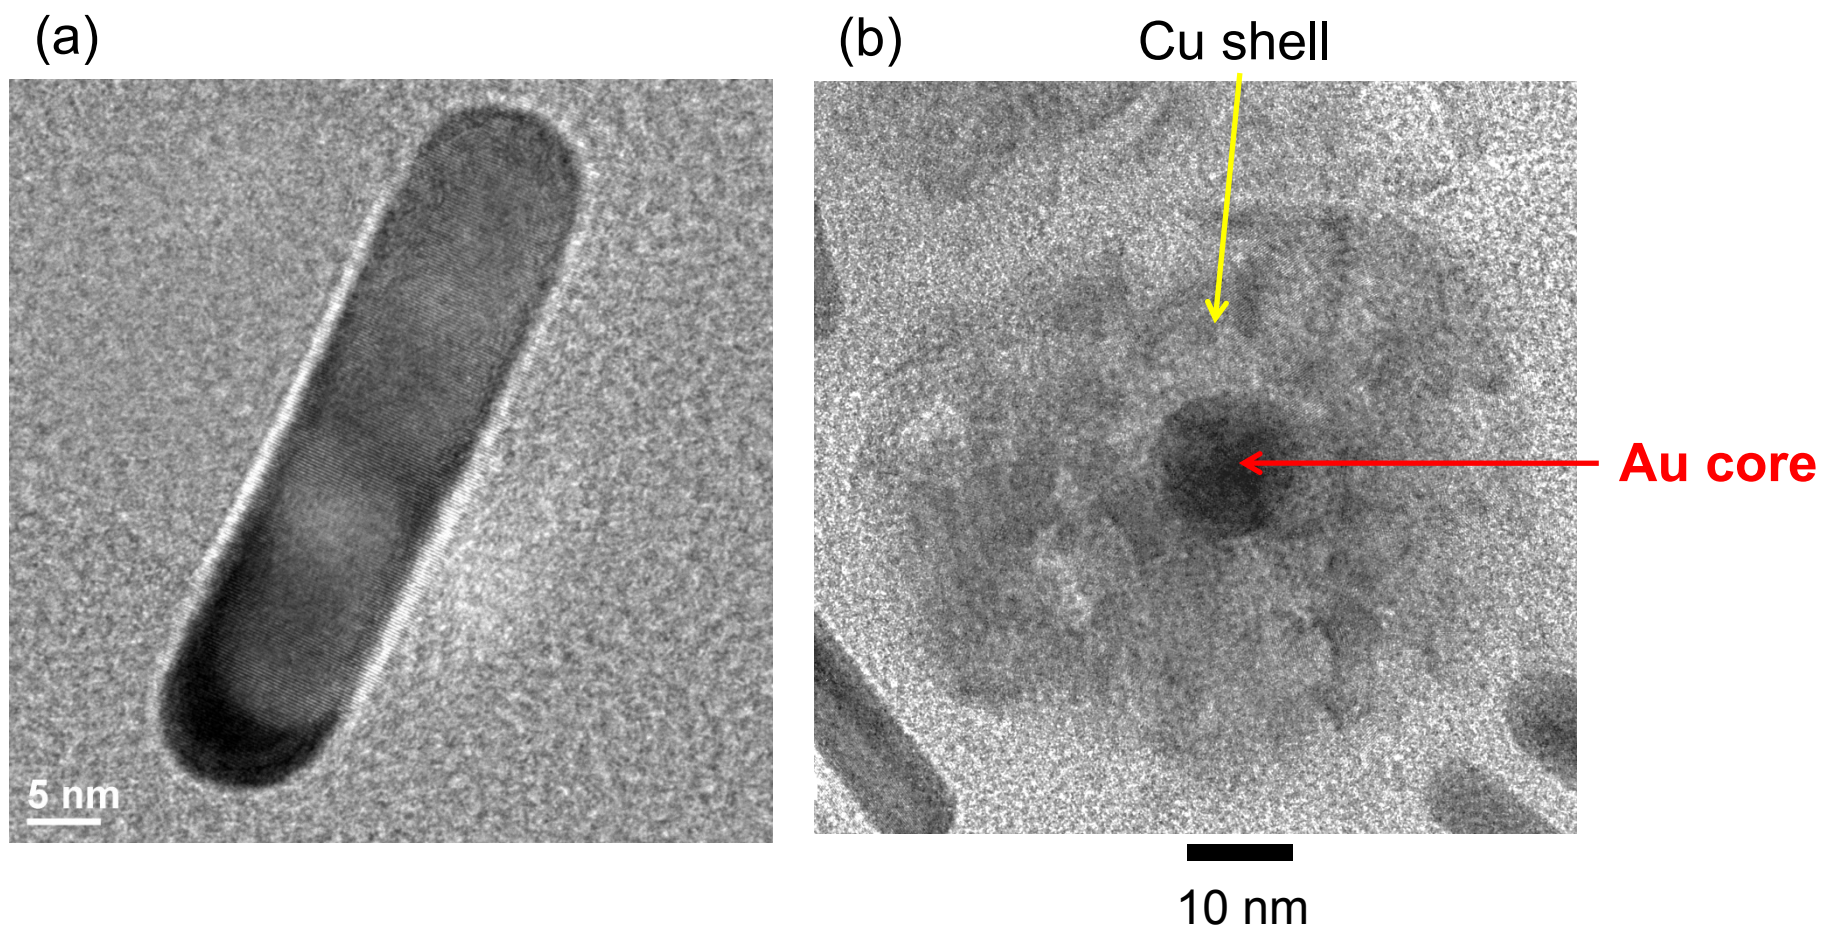

**Fig. S2.** TEM image of (a) Au NR and (b) standing Au NR in Au@Cu.

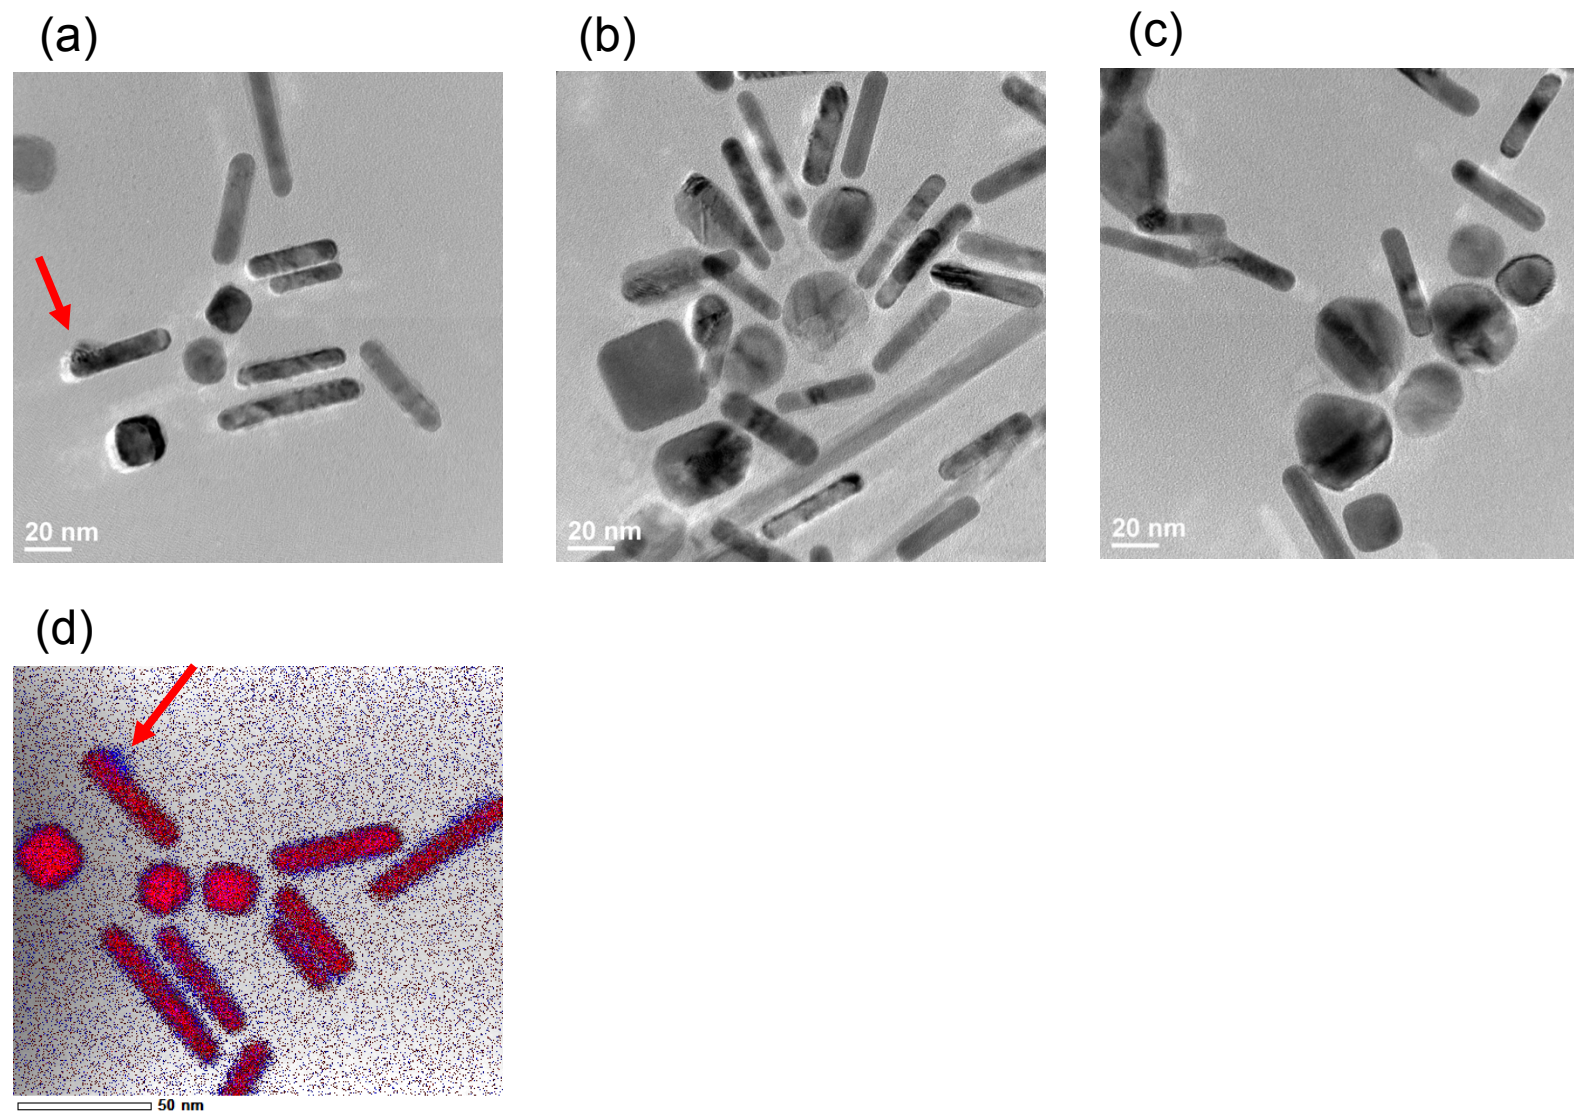

**Fig. S3.** (a)-(c) TEM images of Au-Cu products obtained using  $\text{Cu}(\text{OAc})_2 \cdot \text{H}_2\text{O}/\text{NaCl}$  at 3, 6, and 9 h, respectively. (d) EDS image obtained at 3 h.

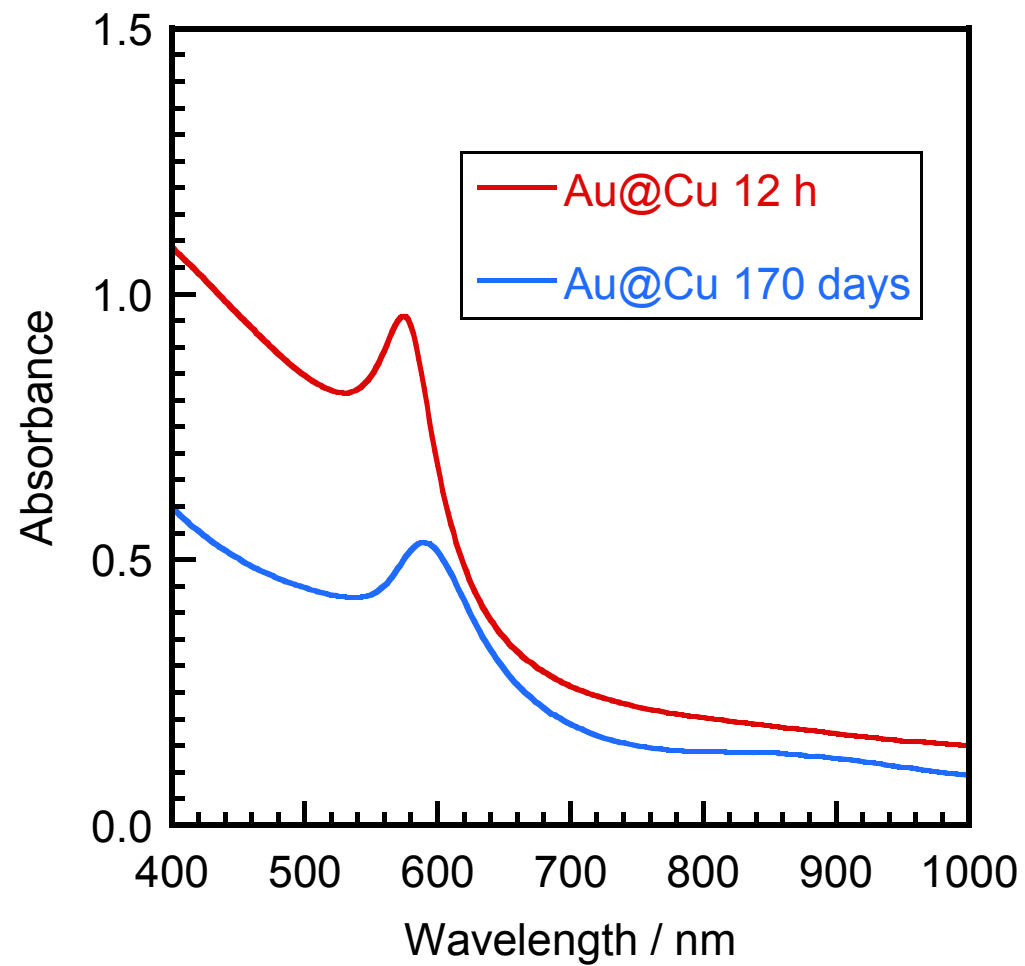

**Fig. S4.** SPR band of Au@Cu NRs obtained just after synthesis and after 170 days.
